# Supplementary material
Source: publisher site journal article supplement (https://www.dovepress.com/get_supplementary_file.php?f=193808-TS4.xlsx)
Supplement: Supplementary file 1 [file get_supplementary_file.php]

## Sheet: TableS4
TableS4: KEGG pathways enriched of the DEGs between S1 and S3
KEGG_term	Num_genes	p_adjust	pvalue
Protein digestion and absorption	11	2.27e-05	1.28e-07
ECM-receptor interaction	8	0.00344272	3.87e-05
PI3K-Akt signaling pathway	16	0.00690035	0.000116298
Focal adhesion	11	0.0119311	0.000268116
Phenylalanine metabolism	3	0.0705877	0.00217028
Human papillomavirus infection	13	0.0705877	0.00238251
Dilated cardiomyopathy (DCM)	6	0.0705877	0.00277592
Porphyrin and chlorophyll metabolism	4	0.090016	0.00404566
Wnt signaling pathway	7	0.131246	0.00782601
Calcium signaling pathway	8	0.131246	0.00784024
Mineral absorption	4	0.131246	0.00811072
Hypertrophic cardiomyopathy (HCM)	5	0.141272	0.00952395
Vascular smooth muscle contraction	6	0.158847	0.0116012
Pentose and glucuronate interconversions	3	0.200242	0.0157494
Amoebiasis	5	0.201894	0.0170944
Renin secretion	4	0.201894	0.0186036
AGE-RAGE signaling pathway in diabetic complications	5	0.201894	0.019282
Drug metabolism - cytochrome P450	4	0.243789	0.0260224
Arrhythmogenic right ventricular cardiomyopathy (ARVC)	4	0.243789	0.0260224
Metabolism of xenobiotics by cytochrome P450	4	0.275512	0.0309564
Complement and coagulation cascades	4	0.283495	0.0349952
cAMP signaling pathway	7	0.283495	0.0355109
Proteoglycans in cancer	7	0.283495	0.0380513
Chemical carcinogenesis	4	0.283495	0.0393266
Cytokine-cytokine receptor interaction	9	0.283495	0.0406649
MAPK signaling pathway	9	0.283495	0.0414094
Axon guidance	6	0.37194	0.0564179
Folate biosynthesis	2	0.392989	0.0619451
Steroid hormone biosynthesis	3	0.392989	0.0647289
Ascorbate and aldarate metabolism	2	0.392989	0.0662341
Ras signaling pathway	7	0.408085	0.0714085
Adrenergic signaling in cardiomyocytes	5	0.408085	0.0751757
Arachidonic acid metabolism	3	0.408085	0.0756563
Retinol metabolism	3	0.457257	0.0873412
Cushing syndrome	5	0.464039	0.093728
Fructose and mannose metabolism	2	0.464039	0.0938505
Glioma	3	0.479823	0.0997385
Rap1 signaling pathway	6	0.487069	0.103981
Tyrosine metabolism	2	0.489718	0.108702
cGMP-PKG signaling pathway	5	0.489718	0.112254
Biosynthesis of amino acids	3	0.489718	0.1128
Drug metabolism - other enzymes	3	0.523554	0.126477
EGFR tyrosine kinase inhibitor resistance	3	0.523554	0.126477
TGF-beta signaling pathway	3	0.560634	0.144359
Synthesis and degradation of ketone bodies	1	0.560634	0.146136
Relaxin signaling pathway	4	0.560634	0.146509
Insulin secretion	3	0.560634	0.148033
Taurine and hypotaurine metabolism	1	0.591588	0.159529
Chemokine signaling pathway	5	0.623493	0.174529
IL-17 signaling pathway	3	0.623493	0.178449
N-Glycan biosynthesis	2	0.623493	0.178641
Arginine and proline metabolism	2	0.6272	0.184288
Circadian entrainment	3	0.6272	0.190274
Aldosterone synthesis and secretion	3	0.6272	0.190274
Prostate cancer	3	0.628697	0.19426
Choline metabolism in cancer	3	0.643009	0.202295
HIF-1 signaling pathway	3	0.644366	0.206342
Melanogenesis	3	0.645733	0.210407
Parathyroid hormone synthesis, secretion and action	3	0.696885	0.23099
Selenocompound metabolism	1	0.699025	0.235626
Regulation of actin cytoskeleton	5	0.704103	0.241294
Cholinergic synapse	3	0.730081	0.256154
Pantothenate and CoA biosynthesis	1	0.730081	0.259442
Cortisol synthesis and secretion	2	0.730081	0.265154
Central carbon metabolism in cancer	2	0.730081	0.270987
One carbon pool by folate	1	0.730081	0.271072
Arginine biosynthesis	1	0.730081	0.282521
Neurotrophin signaling pathway	3	0.730081	0.285966
Glycolysis / Gluconeogenesis	2	0.730081	0.288476
Amphetamine addiction	2	0.730081	0.288476
Terpenoid backbone biosynthesis	1	0.730081	0.293792
Platelet activation	3	0.730081	0.303139
Renin-angiotensin system	1	0.730081	0.304887
Bile secretion	2	0.730081	0.305921
Adherens junction	2	0.730081	0.31172
Melanoma	2	0.730081	0.31172
PPAR signaling pathway	2	0.747342	0.323288
Pertussis	2	0.764051	0.334809
Cardiac muscle contraction	2	0.780211	0.346274
Butanoate metabolism	1	0.796157	0.357823
Apelin signaling pathway	3	0.79863	0.363422
Signaling pathways regulating pluripotency of stem cells	3	0.800263	0.371999
Pentose phosphate pathway	1	0.800263	0.377861
Galactose metabolism	1	0.800263	0.387646
beta-Alanine metabolism	1	0.800263	0.387646
Antifolate resistance	1	0.800263	0.387646
Cell adhesion molecules (CAMs)	3	0.800263	0.393347
Gap junction	2	0.800263	0.40251
Breast cancer	3	0.800263	0.406072
Apoptosis - multiple species	1	0.800263	0.40676
Rheumatoid arthritis	2	0.800263	0.413497
Morphine addiction	2	0.800263	0.418953
Th1 and Th2 cell differentiation	2	0.800263	0.424384
Prion diseases	1	0.800263	0.425283
Oxytocin signaling pathway	3	0.800263	0.427107
Hippo signaling pathway	3	0.802915	0.435451
NF-kappa B signaling pathway	2	0.802915	0.44052
Primary immunodeficiency	1	0.802915	0.443232
Pyruvate metabolism	1	0.802915	0.460625
Inflammatory mediator regulation of TRP channels	2	0.802915	0.461648
JAK-STAT signaling pathway	3	0.802915	0.468366
Glycine, serine and threonine metabolism	1	0.802915	0.469119
Tryptophan metabolism	1	0.802915	0.469119
Ferroptosis	1	0.802915	0.469119
Glucagon signaling pathway	2	0.811983	0.482311
Toll-like receptor signaling pathway	2	0.811983	0.487402
Fatty acid degradation	1	0.811983	0.501787
ABC transporters	1	0.811983	0.501787
Vasopressin-regulated water reabsorption	1	0.811983	0.501787
Carbohydrate digestion and absorption	1	0.811983	0.501787
TNF signaling pathway	2	0.816718	0.517286
Sphingolipid metabolism	1	0.816718	0.524973
Valine, leucine and isoleucine degradation	1	0.816718	0.532461
Notch signaling pathway	1	0.816718	0.532461
Intestinal immune network for IgA production	1	0.816718	0.539833
Cocaine addiction	1	0.816718	0.539833
Malaria	1	0.816718	0.539833
Carbon metabolism	2	0.816718	0.546008
Thyroid hormone signaling pathway	2	0.816718	0.546008
Sphingolipid signaling pathway	2	0.82372	0.555317
Human T-cell leukemia virus 1 infection	4	0.839029	0.570351
Glutathione metabolism	1	0.851365	0.588303
Staphylococcus aureus infection	1	0.851365	0.588303
VEGF signaling pathway	1	0.870134	0.607493
Dopaminergic synapse	2	0.870134	0.612533
Glycerolipid metabolism	1	0.870134	0.619791
Systemic lupus erythematosus	2	0.870134	0.620826
Cytosolic DNA-sensing pathway	1	0.871106	0.631707
Basal cell carcinoma	1	0.871106	0.631707
Neuroactive ligand-receptor interaction	4	0.871106	0.636201
Inflammatory bowel disease (IBD)	1	0.872214	0.643252
Long-term potentiation	1	0.872214	0.654438
RIG-I-like receptor signaling pathway	1	0.872214	0.670569
Phospholipase D signaling pathway	2	0.872214	0.671441
B cell receptor signaling pathway	1	0.872214	0.675779
p53 signaling pathway	1	0.872214	0.680906
Platinum drug resistance	1	0.872214	0.685953
Thyroid hormone synthesis	1	0.872214	0.690921
Bacterial invasion of epithelial cells	1	0.872214	0.690921
Phagosome	2	0.872214	0.692912
MicroRNAs in cancer	4	0.872214	0.695285
Gastric acid secretion	1	0.872214	0.695812
Taste transduction	1	0.911495	0.732268
ErbB signaling pathway	1	0.914059	0.740684
Hepatocellular carcinoma	2	0.914059	0.744599
Tight junction	2	0.914402	0.750513
Longevity regulating pathway	1	0.914402	0.756736
Purine metabolism	2	0.914402	0.761991
GnRH signaling pathway	1	0.914402	0.771803
Small cell lung cancer	1	0.914402	0.771803
Tuberculosis	2	0.914402	0.7757
Endocrine resistance	1	0.917443	0.789341
Phosphatidylinositol signaling system	1	0.917443	0.792684
Transcriptional misregulation in cancer	2	0.917443	0.793742
Chagas disease (American trypanosomiasis)	1	0.92147	0.802403
Th17 cell differentiation	1	0.926969	0.817608
Insulin resistance	1	0.926969	0.817608
Leukocyte transendothelial migration	1	0.936923	0.831651
AMPK signaling pathway	1	0.953726	0.851924
Oocyte meiosis	1	0.95801	0.861132
Human cytomegalovirus infection	2	0.964841	0.872694
Apoptosis	1	0.966933	0.885487
Estrogen signaling pathway	1	0.966933	0.887314
Fluid shear stress and atherosclerosis	1	0.966933	0.890882
Hepatitis B	1	0.967479	0.899319
Gastric cancer	1	0.967479	0.907109
mTOR signaling pathway	1	0.967479	0.910055
Cellular senescence	1	0.967479	0.922206
Necroptosis	1	0.967479	0.924677
Protein processing in endoplasmic reticulum	1	0.967479	0.928238
NOD-like receptor signaling pathway	1	0.967479	0.931632
Influenza A	1	0.967479	0.934867
Alcoholism	1	0.970963	0.943689
Huntington disease	1	0.976319	0.95438
Viral carcinogenesis	1	0.976387	0.959931
Thermogenesis	1	0.985637	0.974585
Endocytosis	1	0.985637	0.9801
Olfactory transduction	2	0.994171	0.994171
